# Supplementary material for: Sexual Difference in Effect of Long Sleep Duration on Incident Sarcopenia after Two Years in Community-Dwelling Older Adults
Source: PubMed Central journal article supplement — Ann Geriatr Med Res. 2022 Sep 28;26(3):264–74. doi: 10.4235/agmr.22.0093 (PMC9535369; doi:10.4235/agmr.22.0093), 2022-09-28
Supplement: agmr-22-0093-suppl1.pdf [file agmr-22-0093-suppl1.pdf]

**Table S1.** Insulin resistance and inflammation of study participants according to incident sarcopenia, 2-year follow-up, by sex

|              | Male (n=631)   |                    |         | Female (n=722) |                   |         |
|--------------|----------------|--------------------|---------|----------------|-------------------|---------|
|              | Normal (n=528) | Sarcopenia (n=103) | p-value | Normal (n=632) | Sarcopenia (n=90) | p-value |
| log(HOMA-IR) | 0.15±0.31      | 0.22±0.37          | 0.032   | 0.25±0.28      | 0.23±0.25         | 0.394   |
| log(hs-CRP)  | -0.10±0.39     | -0.03±0.43         | 0.087   | -0.09±0.36     | -0.09±0.42        | 0.843   |

To evaluate insulin resistance, we used the homeostasis model assessment of insulin resistance (HOMA-IR), according to the following formula:  $HOMA-IR = \text{fasting plasma glucose (mg/dL)} \times \text{fasting insulin } (\mu\text{IU/mL}) / 405$ .<sup>20)</sup>
