# Supplementary material for: Sexual Difference in Effect of Long Sleep Duration on Incident Sarcopenia after Two Years in Community-Dwelling Older Adults
Source: PubMed Central journal article supplement — Ann Geriatr Med Res. 2022 Sep 28;26(3):264–74. doi: 10.4235/agmr.22.0093 (PMC9535369; doi:10.4235/agmr.22.0093), 2022-09-28
Supplement: agmr-22-0093-suppl2.pdf [file agmr-22-0093-suppl2.pdf]

**Table S2.** Odds ratio of sleep duration relationship to index ( $MQI_{Arm}$ ), 2-year follow-up, by sex

|                      | Sleep duration (hr) | Male  |        |         | Female |        |         |       |       |
|----------------------|---------------------|-------|--------|---------|--------|--------|---------|-------|-------|
|                      |                     | OR    | 95% CI | p-value | OR     | 95% CI | p-value |       |       |
| Model1 <sup>a)</sup> | 6–8                 | 1     | Ref    | Ref     | 1      | Ref    | Ref     |       |       |
|                      | <6                  | 1.022 | 0.621  | 1.684   | 0.930  | 1.061  | 0.691   | 1.629 | 0.785 |
|                      | >8                  | 1.504 | 0.661  | 3.423   | 0.330  | 1.58   | 0.569   | 4.391 | 0.380 |
| Model2 <sup>b)</sup> | 6–8                 | 1     | Ref    | Ref     | 1      | Ref    | Ref     |       |       |
|                      | <6                  | 0.989 | 0.594  | 1.646   | 0.966  | 1.081  | 0.700   | 1.670 | 0.725 |
|                      | >8                  | 1.705 | 0.734  | 3.956   | 0.214  | 1.581  | 0.561   | 4.461 | 0.386 |
| Model3 <sup>c)</sup> | 6–8                 | 1     | Ref    | Ref     | 1      | Ref    | Ref     |       |       |
|                      | <6                  | 0.911 | 0.540  | 1.536   | 0.726  | 1.022  | 0.656   | 1.592 | 0.923 |
|                      | >8                  | 1.612 | 0.679  | 3.823   | 0.279  | 1.532  | 0.538   | 4.364 | 0.425 |

OR, odds ratio; CI, confidence interval; BMI, body mass index; CVD, cerebrovascular disease ; HTN, hypertension; DM, diabetes mellitus.

<sup>a)</sup>Unadjusted, <sup>b)</sup>adjusted for age and BMI, <sup>c)</sup>adjusted for age, BMI, polypharmacy, alcohol consumption, education, working, HTN, osteoporosis, and depression. p-value was obtained by logistic regression analysis.

$MQI_{Arm}$  (kg/kg) was defined as the ratio between dominant handgrip strength and dominant arm ASM.<sup>25)</sup> Low  $MQI_{Arm}$  was defined as -1 SD in our study group, which is 11.04 in male and 10.03 in female.<sup>26)</sup>
